# Supplementary material for: Targeting the Nutritional Value of Proteins From Legumes By-Products Through Mild Extraction Technologies
Source: PubMed Central journal article supplement (PMC8326449; doi:10.3389/fnut.2021.695793), 2021-07-19
Supplement: Table_1.pdf [file Table_1.pdf]

Results are the mean of two replicates (n=2).

AMINO ACIDS (% w/w, fresh weight)

| Sample           | Code | <u>Gly</u> | <u>Ala</u> | <u>Ser</u> | <u>Pro</u> | <u>Val</u> | <u>Thr</u> | <u>Ile</u> | <u>Leu</u> | <u>Asp</u> | <u>Lys</u> | <u>Glu</u> | <u>His</u> | <u>Phe</u> | <u>Arg</u> |
|------------------|------|------------|------------|------------|------------|------------|------------|------------|------------|------------|------------|------------|------------|------------|------------|
|                  | LP 1 | 0,21       | 0,23       | 0,25       | 0,20       | 0,27       | 0,19       | 0,22       | 0,41       | 0,53       | 0,29       | 0,73       | 0,05       | 0,26       | 0,38       |
| <i>PEAS</i>      | LP 2 | 0,22       | 0,25       | 0,29       | 0,24       | 0,30       | 0,22       | 0,26       | 0,47       | 0,63       | 0,35       | 0,86       | 0,05       | 0,30       | 0,46       |
|                  | LP 3 | 0,23       | 0,27       | 0,28       | 0,23       | 0,29       | 0,22       | 0,24       | 0,45       | 0,60       | 0,34       | 0,87       | 0,05       | 0,29       | 0,53       |
|                  | LC 1 | 0,31       | 0,34       | 0,44       | 0,36       | 0,42       | 0,32       | 0,38       | 0,67       | 0,92       | 0,56       | 1,34       | 0,23       | 0,52       | 0,68       |
| <i>CHICKPEAS</i> | LC 2 | 0,33       | 0,35       | 0,47       | 0,39       | 0,47       | 0,36       | 0,42       | 0,75       | 1,03       | 0,64       | 1,50       | 0,25       | 0,58       | 0,88       |
|                  | LC 3 | 0,30       | 0,36       | 0,44       | 0,38       | 0,42       | 0,31       | 0,39       | 0,68       | 0,89       | 0,59       | 1,43       | 0,23       | 0,50       | 0,80       |

AMINO ACIDS (% w/w, dry weight)

| Code | <u>Gly</u> | <u>Ala</u> | <u>Ser</u> | <u>Pro</u> | <u>Val</u> | <u>Thr</u> | <u>Ile</u> | <u>Leu</u> | <u>Asp</u> | <u>Lys</u> | <u>Glu</u> | <u>His</u> | <u>Phe</u> | <u>Arg</u> |
|------|------------|------------|------------|------------|------------|------------|------------|------------|------------|------------|------------|------------|------------|------------|
| LP 1 | 0,94       | 1,06       | 1,13       | 0,92       | 1,24       | 0,88       | 1,00       | 1,87       | 2,41       | 1,32       | 3,32       | 0,21       | 1,18       | 1,71       |
| LP 2 | 1,17       | 1,30       | 1,53       | 1,23       | 1,58       | 1,13       | 1,35       | 2,44       | 3,26       | 1,84       | 4,49       | 0,25       | 1,55       | 2,42       |
| LP 3 | 0,94       | 1,11       | 1,15       | 0,95       | 1,19       | 0,88       | 0,99       | 1,81       | 2,43       | 1,37       | 3,53       | 0,20       | 1,16       | 2,15       |
| LC 1 | 0,69       | 0,76       | 0,98       | 0,80       | 0,92       | 0,71       | 0,83       | 1,48       | 2,04       | 1,25       | 2,96       | 0,50       | 1,14       | 1,51       |
| LC 2 | 0,66       | 0,69       | 0,93       | 0,77       | 0,92       | 0,70       | 0,83       | 1,48       | 2,04       | 1,26       | 2,97       | 0,50       | 1,16       | 1,75       |
| LC 3 | 0,65       | 0,76       | 0,95       | 0,81       | 0,91       | 0,67       | 0,83       | 1,45       | 1,90       | 1,26       | 3,06       | 0,49       | 1,06       | 1,70       |

| <u>Tyr</u> | <u>Cys</u> | <u>Met</u> | <u>Trp</u> | AA sum |
|------------|------------|------------|------------|--------|
| 0,14       | 0,09       | 0,08       | 0,26       | 4,8    |
| 0,16       | 0,09       | 0,07       | 0,18       | 5,4    |
| 0,14       | 0,23       | 0,13       | 0,23       | 5,6    |
| 0,20       | 0,15       | 0,13       | 0,54       | 8,5    |
| 0,23       | 0,15       | 0,15       | 0,42       | 9,4    |
| 0,21       | 0,14       | 0,14       | 0,34       | 8,5    |

| <u>Tyr</u> | <u>Cys</u> | <u>Met</u> | <u>Trp</u> | AA sum |
|------------|------------|------------|------------|--------|
| 0,64       | 0,43       | 0,37       | 1,18       | 21,8   |
| 0,86       | 0,49       | 0,38       | 0,94       | 28,2   |
| 0,58       | 0,94       | 0,51       | 0,93       | 22,8   |
| 0,45       | 0,32       | 0,30       | 1,19       | 18,8   |
| 0,45       | 0,30       | 0,30       | 0,83       | 18,6   |
| 0,44       | 0,29       | 0,29       | 0,73       | 18,3   |
