# Supplementary material for: Targeting the Nutritional Value of Proteins From Legumes By-Products Through Mild Extraction Technologies
Source: PubMed Central journal article supplement (PMC8326449; doi:10.3389/fnut.2021.695793), 2021-07-19
Supplement: Table_2.pdf [file Table_2.pdf]

AMINO ACIDS (% w/w, dry weight)

Results are mean values of two replicates (n=2).

| % AA (w/w dry extract)         | <i>Gly</i> | <i>Ala</i> | <i>Ser</i> | <i>Pro</i> | <i>Val</i> | <i>Thr</i> | <i>Ile</i> | <i>Leu</i> | <i>Asp</i> | <i>Lys</i> | <i>Glu</i> | <i>His</i> | <i>Phe</i> | <i>Arg</i> | <i>Tyr</i> | <i>Cys</i> | <i>Met</i> | <i>sum AA</i> |
|--------------------------------|------------|------------|------------|------------|------------|------------|------------|------------|------------|------------|------------|------------|------------|------------|------------|------------|------------|---------------|
| EFAE LC lab scale              | 2,7        | 3,1        | 3,8        | 3,1        | 3,3        | 2,3        | 3,2        | 5,6        | 8,3        | 2,6        | 12,0       | 1,6        | 4,6        | 7,4        | 2,0        | 0,7        | 0,8        | 67,2          |
| EFAE LP lab scale              | 2,3        | 2,2        | 2,7        | 2,2        | 2,7        | 2,0        | 2,4        | 4,3        | 5,4        | 2,4        | 8,0        | 1,2        | 2,5        | 4,0        | 1,8        | 0,7        | 0,7        | 47,4          |
| EAE LC alcalase                | 1,4        | 1,5        | 1,9        | 1,4        | 1,5        | 1,3        | 1,3        | 2,5        | 4,1        | 1,5        | 6,1        | 0,9        | 1,9        | 2,6        | 1,1        | 0,7        | 0,6        | 32,0          |
| EAE LC papain                  | 1,9        | 1,8        | 2,2        | 1,7        | 1,9        | 1,7        | 1,7        | 2,9        | 5,0        | 1,9        | 7,7        | 1,1        | 2,2        | 3,1        | 1,4        | 1,3        | 0,9        | 40,2          |
| EAE LC pepsin                  | 1,6        | 1,3        | 1,4        | 1,3        | 1,2        | 1,3        | 1,1        | 1,7        | 3,0        | 1,4        | 4,4        | 0,9        | 1,3        | 2,3        | 1,0        | 0,5        | 0,3        | 26,2          |
| EAE LC trypsin                 | 1,2        | 1,3        | 1,6        | 1,3        | 1,4        | 1,2        | 1,3        | 2,3        | 3,6        | 1,6        | 5,7        | 1,0        | 1,7        | 2,3        | 1,0        | 0,7        | 0,4        | 29,6          |
| EAE LC mix (alcalase + papain) | 1,4        | 1,5        | 1,8        | 1,4        | 1,5        | 1,3        | 1,4        | 2,4        | 4,0        | 1,6        | 6,2        | 0,9        | 1,8        | 2,8        | 1,1        | 1,0        | 0,8        | 33,0          |
| EAE LP alcalase                | 2,1        | 1,7        | 2,1        | 1,6        | 2,2        | 1,7        | 2,1        | 3,3        | 4,3        | 3,1        | 5,7        | 0,0        | 2,3        | 2,6        | 1,3        | 0,4        | 0,5        | 37,0          |
| EAE LP papain                  | 3,2        | 2,5        | 3,3        | 2,5        | 3,2        | 2,5        | 2,8        | 4,7        | 5,7        | 4,2        | 8,6        | 0,0        | 3,9        | 4,5        | 2,6        | 1,0        | 0,6        | 55,9          |
| EAE LP pepsin                  | 4,4        | 3,0        | 3,1        | 3,3        | 2,6        | 2,4        | 2,2        | 3,5        | 5,6        | 3,6        | 7,7        | 0,0        | 2,6        | 3,6        | 1,7        | 0,6        | 0,4        | 50,2          |
| EAE LP trypsin                 | 2,0        | 2,2        | 2,8        | 2,1        | 2,5        | 1,9        | 2,4        | 4,0        | 5,3        | 4,4        | 7,9        | 0,0        | 2,7        | 3,2        | 1,7        | 0,4        | 0,5        | 46,0          |
| EAE LP mix (alcalase + papain) | 1,9        | 1,7        | 2,2        | 1,7        | 2,2        | 1,8        | 2,0        | 3,5        | 3,6        | 2,7        | 5,3        | 0,0        | 2,8        | 2,5        | 1,4        | 0,5        | 0,4        | 36,3          |
