# Supplementary material for: Targeting the Nutritional Value of Proteins From Legumes By-Products Through Mild Extraction Technologies
Source: PubMed Central journal article supplement (PMC8326449; doi:10.3389/fnut.2021.695793), 2021-07-19
Supplement: Table_3.pdf [file Table_3.pdf]

**Table 3S.** AAS of all the samples object of these studies. In bold the limiting amino acid.

|            | LP 1        | LP 2        | LP 3        | LC 1        | LC 2        | LC 3        |
|------------|-------------|-------------|-------------|-------------|-------------|-------------|
| <u>His</u> | <b>0.39</b> | <b>0.37</b> | <b>0.36</b> | 1.11        | 1.12        | 1.11        |
| <u>Ile</u> | 0.70        | 0.72        | 0.66        | 0,67        | 0.68        | 0.69        |
| <u>Leu</u> | 0.98        | 0.98        | 0.90        | 0.90        | 0.91        | 0.90        |
| <u>Lys</u> | 1.15        | 1.23        | 1.13        | 1,25        | 1.29        | 1.30        |
| <u>Met</u> | 0.54        | 0.44        | 0.71        | <b>0.51</b> | <b>0.51</b> | <b>0.52</b> |
| <u>Phe</u> | 0.94        | 0.96        | 0.89        | 1.05        | 1.08        | 1.01        |
| <u>Thr</u> | 1.02        | 1.01        | 0.97        | 0.95        | 0.96        | 0.92        |
| <u>Val</u> | 0.77        | 0.76        | 0.71        | 0.66        | 0.67        | 0.67        |

|            | DAE LP      | EAE LP alcalase | EAE LP papain | EAE LP pepsin | EAE LP trypsin | EAE LP mix  |
|------------|-------------|-----------------|---------------|---------------|----------------|-------------|
| <u>His</u> | 1.04        | <LOQ            | <LOQ          | <LOQ          | <LOQ           | <LOQ        |
| <u>Ile</u> | 0.74        | 0.84            | 0.76          | 0.64          | 0.76           | 0.83        |
| <u>Leu</u> | 1.02        | 1.00            | 0.94          | 0.77          | 0.96           | 1.08        |
| <u>Lys</u> | 0.96        | 1.57            | 1.41          | 1.33          | 1.78           | 1.41        |
| <u>Met</u> | <b>0.46</b> | <b>0.42</b>     | <b>0.33</b>   | <b>0.26</b>   | <b>0.36</b>    | <b>0.37</b> |
| <u>Phe</u> | 0.91        | 1.06            | 1.21          | 0.88          | 1.02           | 1.31        |
| <u>Thr</u> | 1.06        | 1.13            | 1.12          | 1.19          | 1.04           | 1.20        |
| <u>Val</u> | 0.75        | 0.79            | 0.76          | 0.68          | 0.72           | 0.82        |

|            | DAE LC      | EAE LC alcalase | EAE LC papain | EAE LC pepsin | EAE LC trypsin | EAE LC mix  |
|------------|-------------|-----------------|---------------|---------------|----------------|-------------|
| <u>His</u> | 0.98        | 1.10            | 1.11          | 1.34          | 1.34           | 1.12        |
| <u>Ile</u> | 0.71        | <b>0.62</b>     | 0.63          | 0.63          | 0.66           | 0.63        |
| <u>Leu</u> | 0.93        | 0.86            | 0.82          | 0.74          | 0.86           | 0.82        |
| <u>Lys</u> | 0.73        | 0.86            | 0.86          | 1.03          | 0.98           | 0.93        |
| <u>Met</u> | <b>0,40</b> | 0.63            | 0.72          | <b>0.41</b>   | <b>0.42</b>    | 0.78        |
| <u>Phe</u> | 1.18        | 0.99            | 0.93          | 0.88          | 1.01           | 0.93        |
| <u>Thr</u> | 0.85        | 1.02            | 1.03          | 1.26          | 1.02           | 1.01        |
| <u>Val</u> | 0.65        | 0.62            | <b>0.63</b>   | 0.62          | 0.62           | <b>0.62</b> |
